# Supplementary material for: Converting Pasteurella multocida α2–3-sialyltransferase 1 (PmST1) to a regioselective α2–6-sialyltransferase by saturation mutagenesis and regioselective screening
Source: Royal Society of Chemistry journal article supplement (doi:10.1039/c6ob02702d), 2017-01-01

## Supporting Information

for

### Converting *Pasteurella multocida* $\alpha$ 2–3-sialyltransferase 1 (PmST1) to a regioselective $\alpha$ 2–6-sialyltransferase by saturation mutagenesis and regioselective screening

John B. McArthur,<sup>a</sup> Hai Yu,<sup>a</sup> Jie Zeng,<sup>a,b</sup> and Xi Chen<sup>\*a</sup>

<sup>a</sup>Department of Chemistry, University of California, One Shields Avenue, Davis, CA 95616, USA

<sup>b</sup>School of Food Science, Henan Institute of Science and Technology, Xinxiang, Henan 453003, China

\*Corresponding author. E-mail: xiichen@ucdavis.edu; Fax: +1 530 752-8995; Tel: +1 530 754-6037

#### Table of Contents

|                                                                                                                                                          |       |
|----------------------------------------------------------------------------------------------------------------------------------------------------------|-------|
| <b>Table S1.</b> <sup>13</sup> C NMR chemical shift assignment for LNnTβProN <sub>3</sub> and Neu5Acα2–6LNnTβProN <sub>3</sub> .....                     | S2    |
| <b>Figure S1.</b> pH profiles of sialylation yields and sialyl product linkage specificities of PmST1-catalyzed reactions.....                           | S3    |
| <b>Figure S2.</b> pH profiles of α2–6-sialyl product percentages (A) and sialylation yields (B) of PmST1 P34H/M144L-catalyzed reactions. ....            | S3    |
| <b>Figure S3.</b> Donor substrate promiscuity of PmST1 P34H/M144L confirmed by HRMS results.....                                                         | S4–S8 |
| <b>Figure S4.</b> <sup>1</sup> H and <sup>13</sup> C NMR spectra of Neu5Acα2–6LNnTβProN <sub>3</sub> .....                                               | S9    |
| <b>Figure S5.</b> Comparison of <sup>13</sup> C NMR spectra of LNnTβProN <sub>3</sub> and Neu5Acα2–6LNTβProN <sub>3</sub> in the range of 56–65 ppm..... | S10   |
| <b>Figure S6.</b> <sup>1</sup> H and <sup>13</sup> C NMR spectra of Neu5Acα2–6Galβ1–4GlcNAcβ1–3(Neu5Acα2–6)Galβ1–4GlcβProN <sub>3</sub> .....            | S11   |

**Table S1.**  $^{13}\text{C}$  NMR chemical shift assignment for LNnT $\beta$ ProN $_3$  and Neu5Ac $\alpha$ 2–6LNnT $\beta$ ProN $_3$ .

| Residue            | Carbon atom                     | Chemical shift (ppm)                                                                            |                                           |
|--------------------|---------------------------------|-------------------------------------------------------------------------------------------------|-------------------------------------------|
|                    |                                 | Gal $\beta$ 1–4GlcNAc $\beta$ 1–3Gal $\beta$ 1–4Glc $\beta$ ProN $_3$ (LNnT $\beta$ ProN $_3$ ) | Neu5Ac $\alpha$ 2–6LNnT $\beta$ ProN $_3$ |
| 4Glc $\beta$ 1–    | 1                               | 101.98                                                                                          | 101.98                                    |
|                    | 2                               | 72.66                                                                                           | 73.56                                     |
|                    | 3                               | 74.22                                                                                           | 74.23                                     |
|                    | 4                               | 78.19                                                                                           | 78.22                                     |
|                    | 5                               | 74.64                                                                                           | 74.65                                     |
|                    | 6                               | 59.91                                                                                           | 59.90                                     |
| 3Gal $\beta$ 1–    | 1                               | 102.73                                                                                          | 102.82                                    |
|                    | 2                               | 69.83                                                                                           | 69.84                                     |
|                    | 3                               | 81.92                                                                                           | 81.89                                     |
|                    | 4                               | 68.20                                                                                           | 68.19                                     |
|                    | 5                               | 74.75                                                                                           | 74.76                                     |
|                    | 6                               | 60.83                                                                                           | 60.84                                     |
| 4GlcNAc $\beta$ 1– | 1                               | 102.81                                                                                          | 102.47                                    |
|                    | 2                               | 55.06                                                                                           | 54.80                                     |
|                    | 3                               | 72.05                                                                                           | 72.11                                     |
|                    | 4                               | 77.99                                                                                           | 80.30                                     |
|                    | 5                               | 74.42                                                                                           | 74.13                                     |
|                    | 6                               | 59.71                                                                                           | 59.99                                     |
|                    | C=O                             | 174.83                                                                                          | 174.78                                    |
|                    | CH $_3$                         | 22.03                                                                                           | 22.16                                     |
|                    |                                 |                                                                                                 |                                           |
| 6Gal $\beta$ 1–    | 1                               | 102.63                                                                                          | 103.33                                    |
|                    | 2                               | 70.83                                                                                           | 70.60                                     |
|                    | 3                               | 72.37                                                                                           | 72.41                                     |
|                    | 4                               | 68.42                                                                                           | 68.27                                     |
|                    | 5                               | 75.22                                                                                           | 72.66                                     |
|                    | 6                               | 60.91                                                                                           | 63.22                                     |
| Neu5Ac $\alpha$ 2– | 1                               |                                                                                                 | 173.43                                    |
|                    | 2                               |                                                                                                 | 100.00                                    |
|                    | 3                               |                                                                                                 | 39.94                                     |
|                    | 4                               |                                                                                                 | 68.08                                     |
|                    | 5                               |                                                                                                 | 51.76                                     |
|                    | 6                               |                                                                                                 | 72.29                                     |
|                    | 7                               |                                                                                                 | 68.23                                     |
|                    | 8                               |                                                                                                 | 71.59                                     |
|                    | 9                               |                                                                                                 | 62.52                                     |
|                    | C=O                             |                                                                                                 | 174.81                                    |
|                    | CH $_3$                         |                                                                                                 | 21.91                                     |
| ProN $_3$          | OCH $_2$ CH $_2$ CH $_2$ N $_3$ | 67.24                                                                                           | 67.24                                     |
|                    | OCH $_2$ CH $_2$ CH $_2$ N $_3$ | 28.10                                                                                           | 28.10                                     |
|                    | OCH $_2$ CH $_2$ CH $_2$ N $_3$ | 47.73                                                                                           | 47.73                                     |

**Figure S1.** pH profiles of sialylation yields and sialyl product linkage specificities of PmST1-catalyzed reactions. A,  $\alpha$ 2-3-sialyl product percentages; B,  $\alpha$ 2-6-sialyl product percentages; and C, sialylation yields.

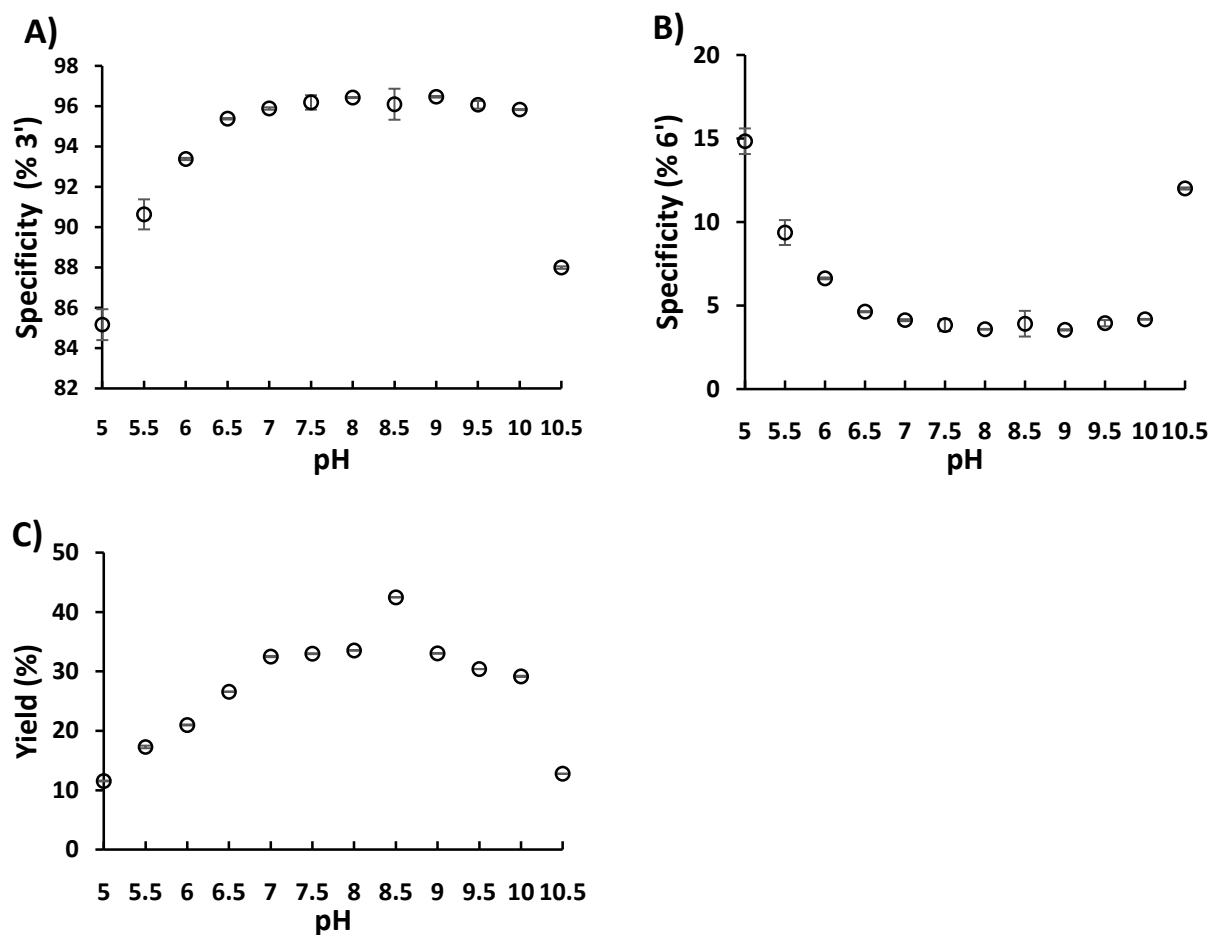

**Figure S2.** pH profiles of  $\alpha$ 2-6-sialyl product percentages (A) and sialylation yields (B) of PmST1 P34H/M144L-catalyzed reactions.

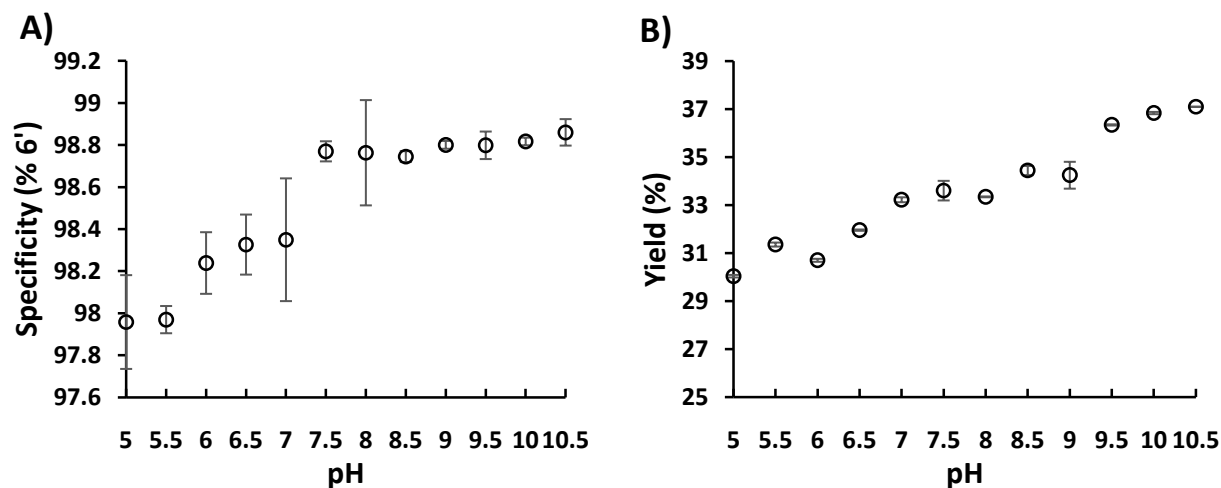

**Figure S3.** Donor substrate promiscuity of PmST1 P34H/M144L confirmed by HRMS results.

**A** Lac $\beta$ ProN<sub>3</sub> with ManGcOMe (A)

Lacβ Rx1 GcOMe 24h #20-82 RT: 0.16-0.65 AV: 63 NL: 7.85E5  
T: FTMS - p ESI Full ms [200.00-1000.00]

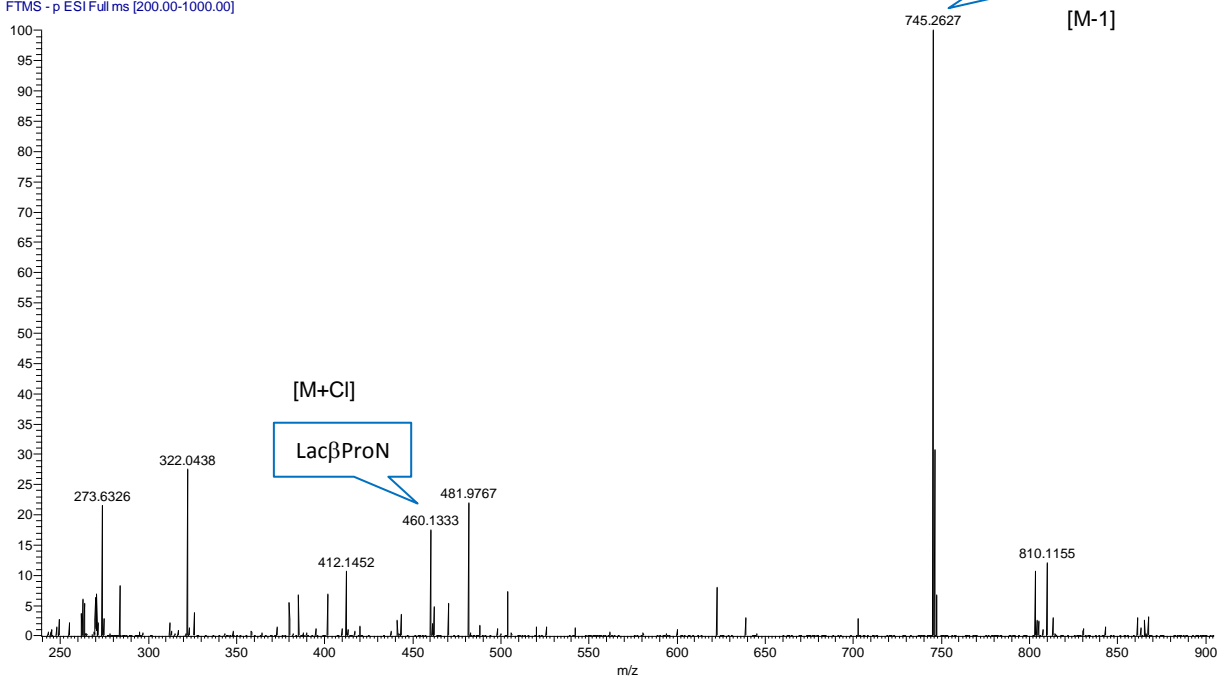

**B** Lac $\beta$ ProN<sub>3</sub> with mannose (B)

Lacβ Rx2 Man 24h #21-92 RT: 0.17-0.73 AV: 72 NL: 4.38E5  
T: FTMS - p ESI Full ms [200.00-1000.00]

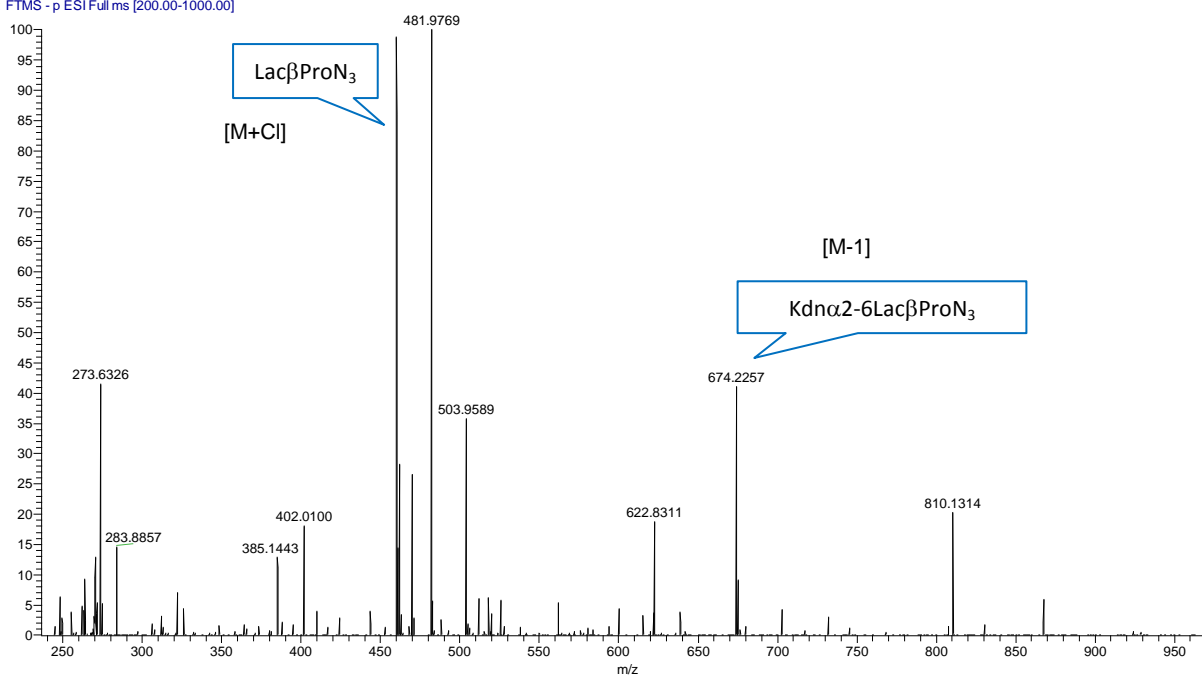

### C Lac $\beta$ ProN<sub>3</sub> with ManNAc6N<sub>3</sub> (C)

LacB Rx3 6N3ManNAc 24h #20-69 RT: 0.16-0.55 AV: 50 NL: 1.77E6  
T: FTMS - p ESI Full ms [200.00-1000.00]

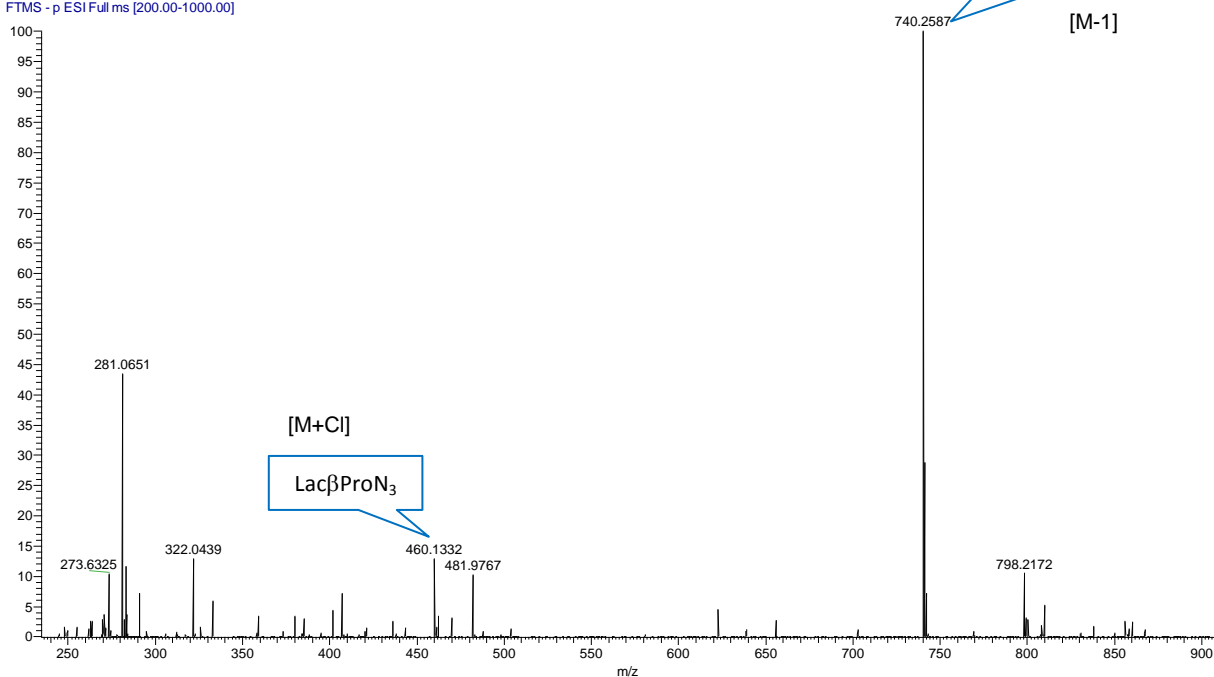

### D Lac $\beta$ ProN<sub>3</sub> with ManNAc4N<sub>3</sub> (D)

LacB Rx5 4N3ManNAc 24h #19-77 RT: 0.15-0.61 AV: 59 NL: 9.35E5  
T: FTMS - p ESI Full ms [200.00-1000.00]

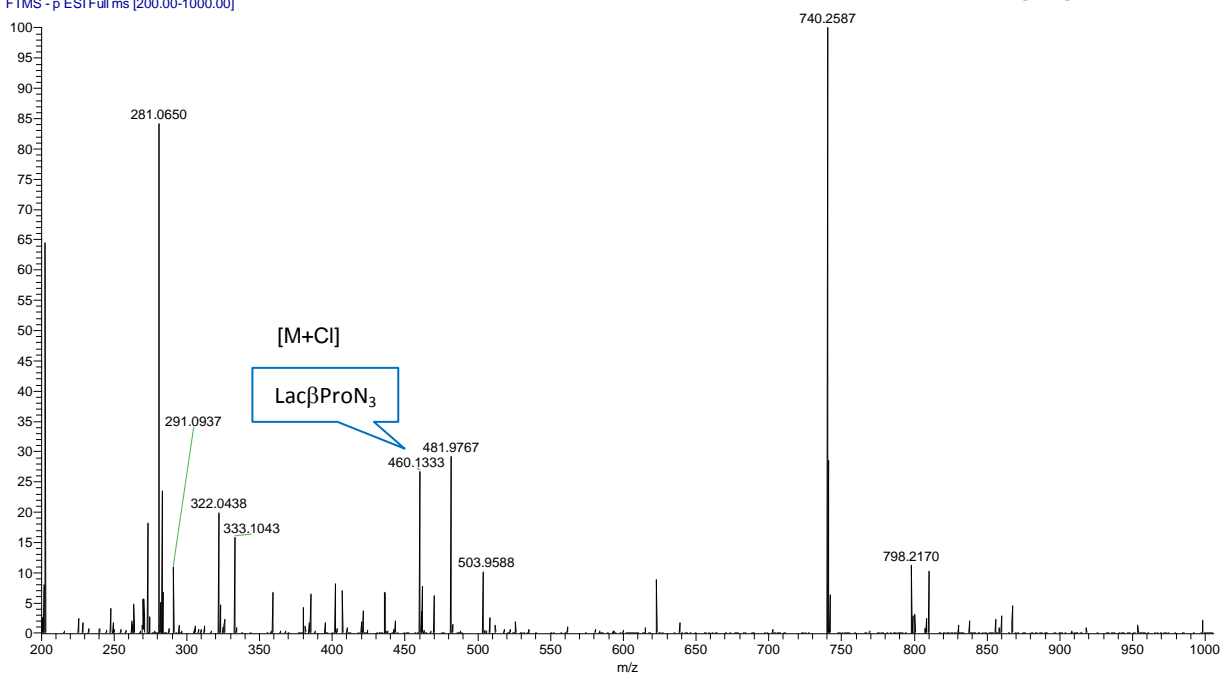

## E LacβProN<sub>3</sub> with ManNAc6OMe (E)

Lacβ Rx6 4MeNeu5Ac 24h #20-74 RT: 0.15-0.58 AV: 55 NL: 4.08E5  
T: FTMS - p ESI Full ms [200.00-1000.00]

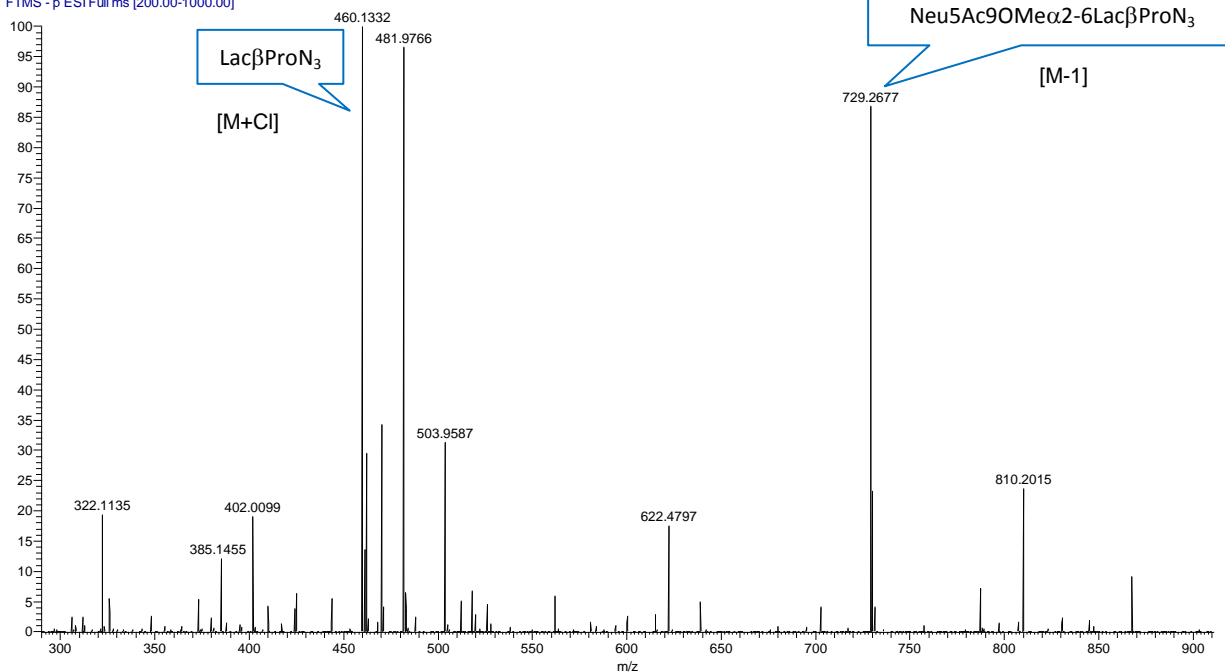

## F LacβProN<sub>3</sub> with ManNAz (F)

Lacβ Rx7 ManNAz 24h #22-81 RT: 0.17-0.64 AV: 60 NL: 6.73E5  
T: FTMS - p ESI Full ms [200.00-1000.00]

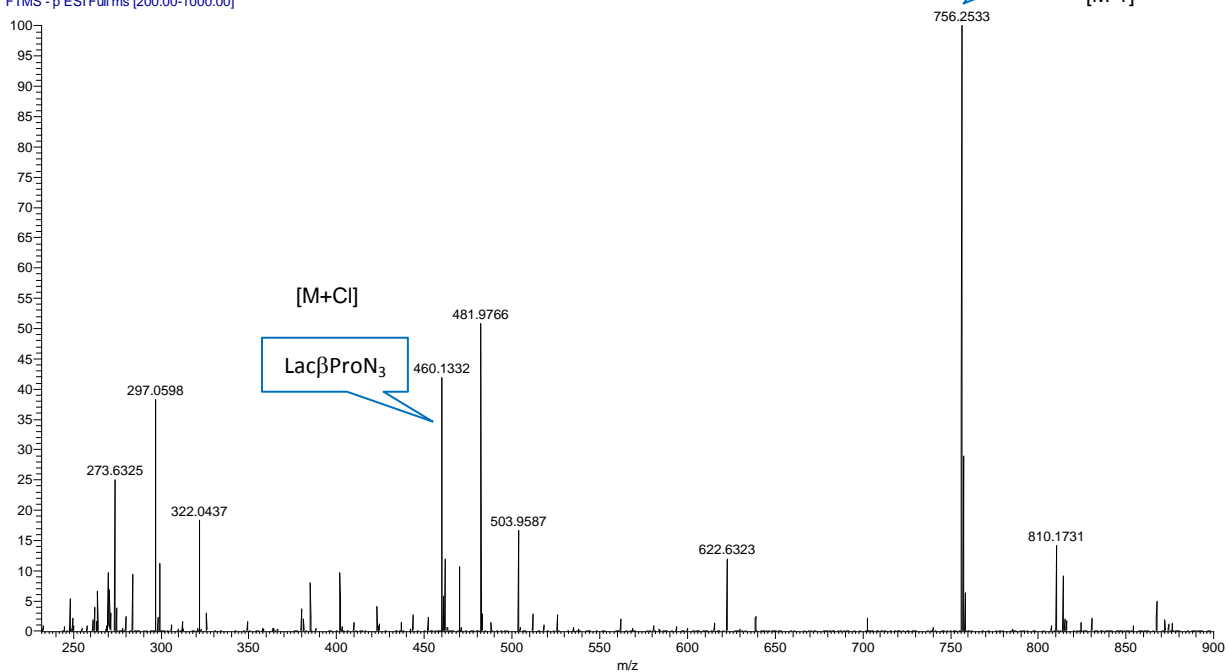

### G Lac $\beta$ ProN<sub>3</sub> with Neu5Ac (G)

Lac $\beta$  rx8 Neu5Ac 1h #28-96 RT: 0.22-0.76 AV: 69 NL: 1.34E6  
T: FTMS - p ESI Full ms [200.00-900.00]

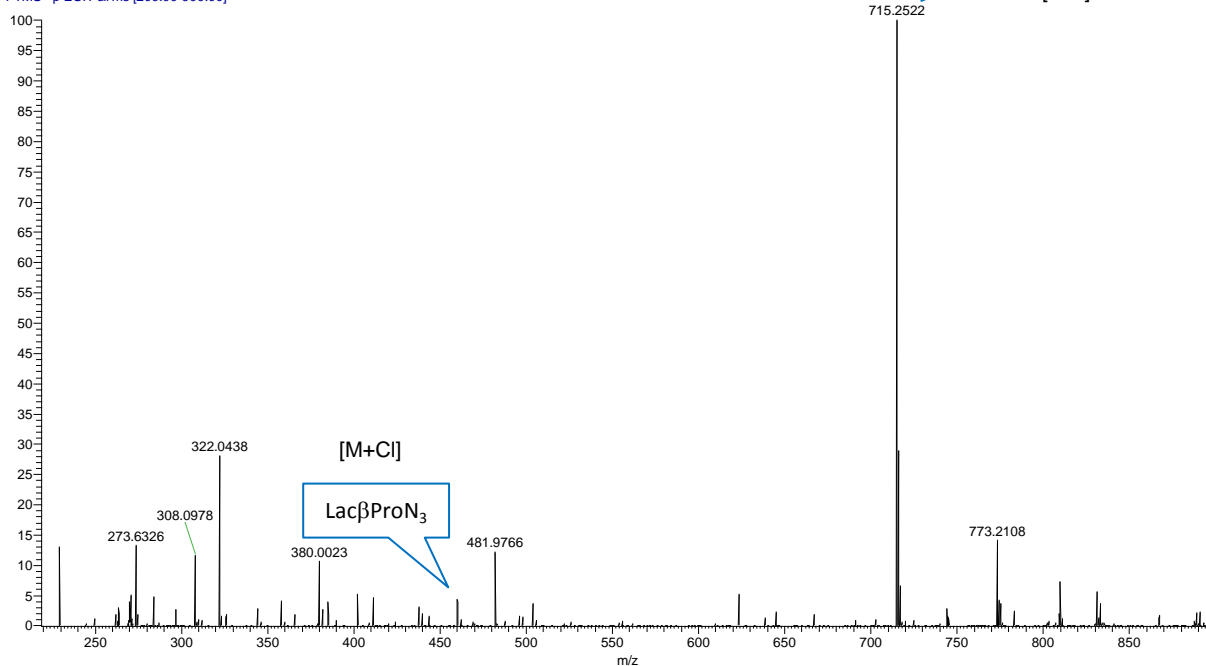

### H Lac $\beta$ ProN<sub>3</sub> with Neu5Gc (H)

Lac $\beta$  rx9 Neu5Gc 1h #19-96 RT: 0.15-0.76 AV: 78 NL: 6.00E5  
T: FTMS - p ESI Full ms [200.00-900.00]

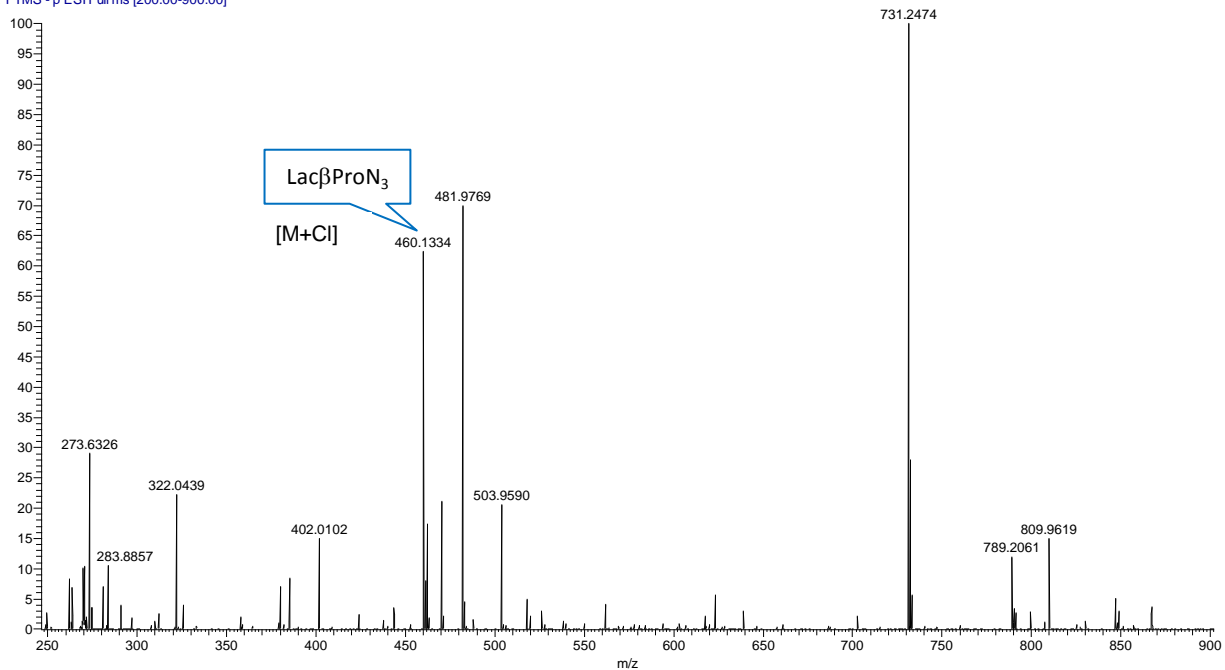

# I Lac $\beta$ ProN<sub>3</sub> with Neu5Ac8OMe (I)

Lacb rx10 Neu5Ac8Me 1h #19-76 RT: 0.14-0.60 AV: 58 NL: 5.86E5  
T: FTMS - p ESI Full ms [200.00-900.00]

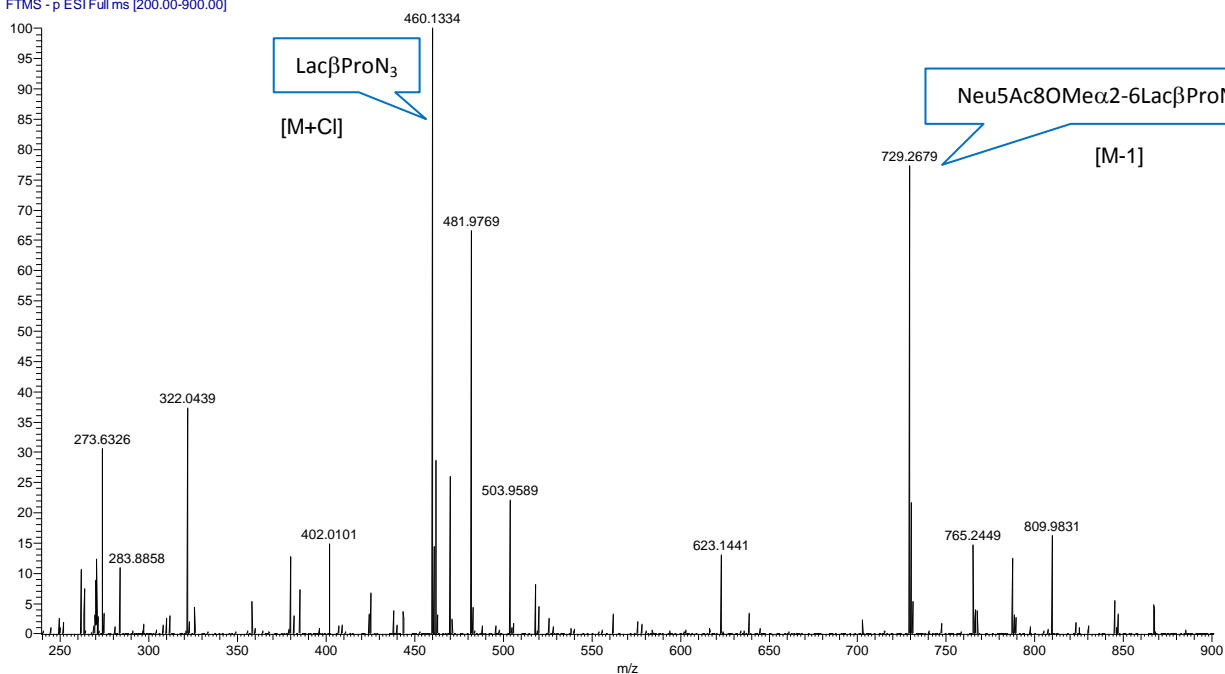

# J Lac $\beta$ ProN<sub>3</sub> with Neu5,9Ac<sub>2</sub> (J)

Lacb rx11 Neu5Ac9Ac1h #20-77 RT: 0.15-0.61 AV: 58 NL: 1.93E6  
T: FTMS - p ESI Full ms [200.00-900.00]

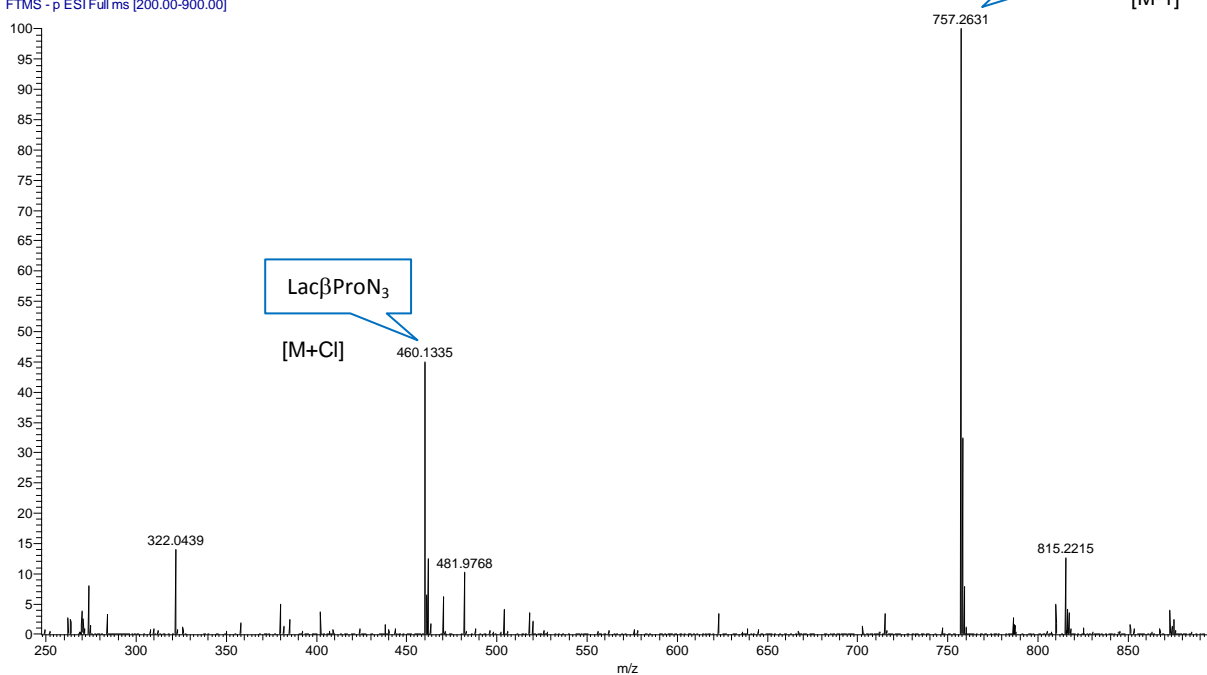



**Figure S4.**  $^1\text{H}$  and  $^{13}\text{C}$  NMR spectra of Neu5Ac $\alpha$ 2-6LNnT $\beta$ ProN $_3$

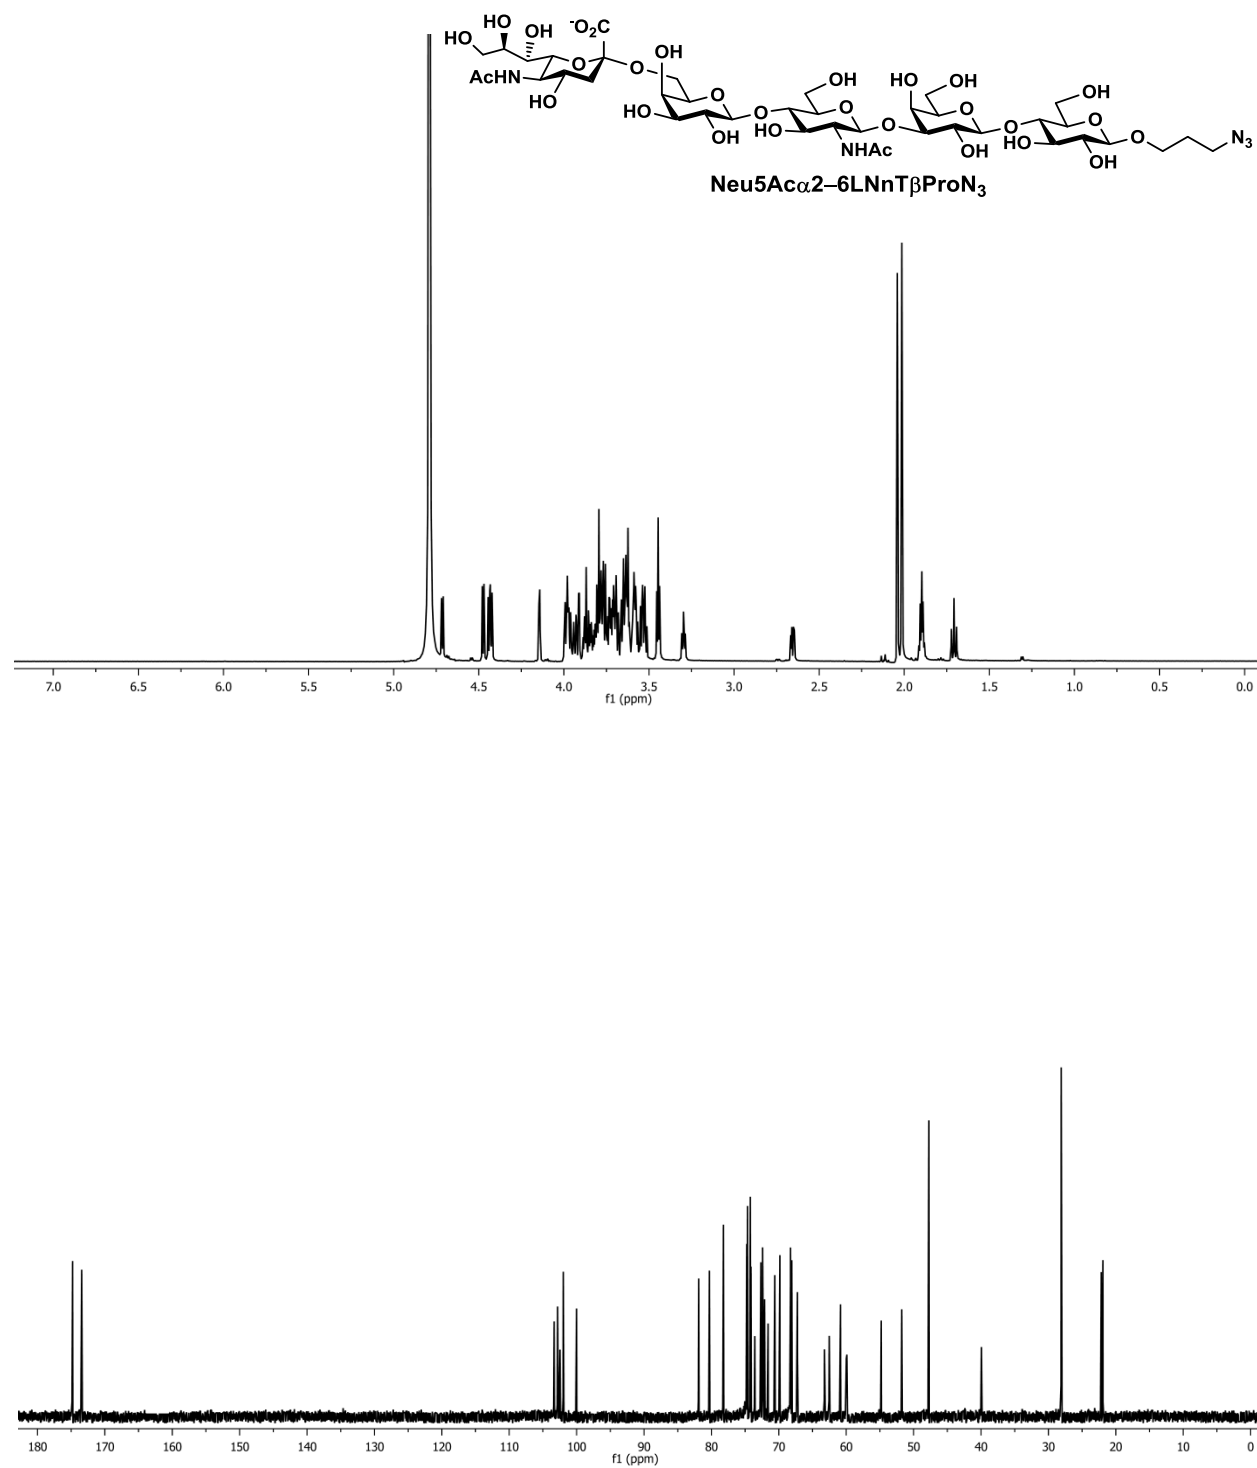

**Figure S5.** Comparison of  $^{13}\text{C}$  spectra of  $\text{LNnT}\beta\text{ProN}_3$  and  $\text{Neu5Ac}\alpha 2\text{--}6\text{LNnT}\beta\text{ProN}_3$  in the range of 56–65 ppm.

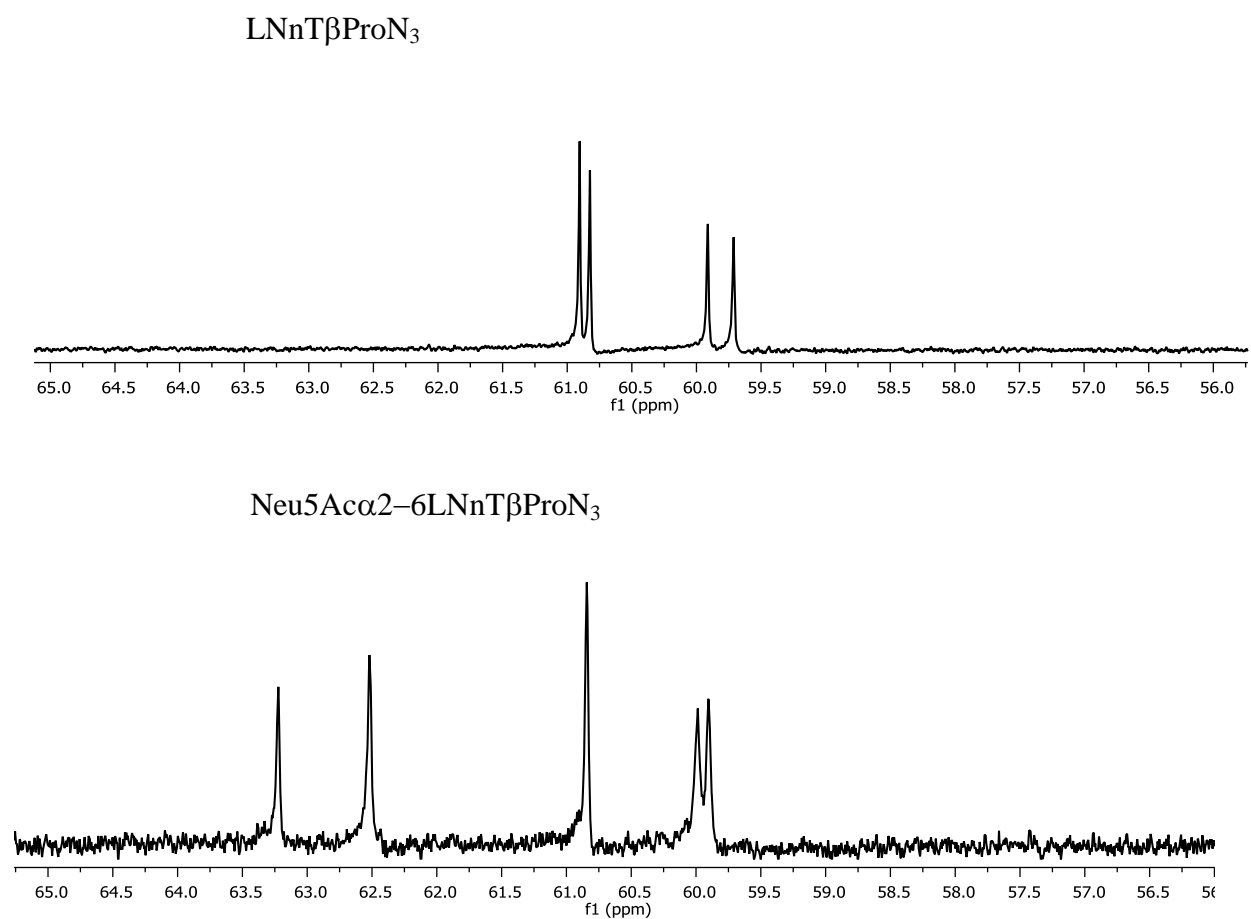

**Figure S6.**  $^1\text{H}$  and  $^{13}\text{C}$  NMR spectra of Neu5Ac $\alpha$ 2-6Gal $\beta$ 1-4GlcNAc $\beta$ 1-3(Neu5Ac $\alpha$ 2-6)Gal $\beta$ 1-4Glc $\beta$ ProN $_3$

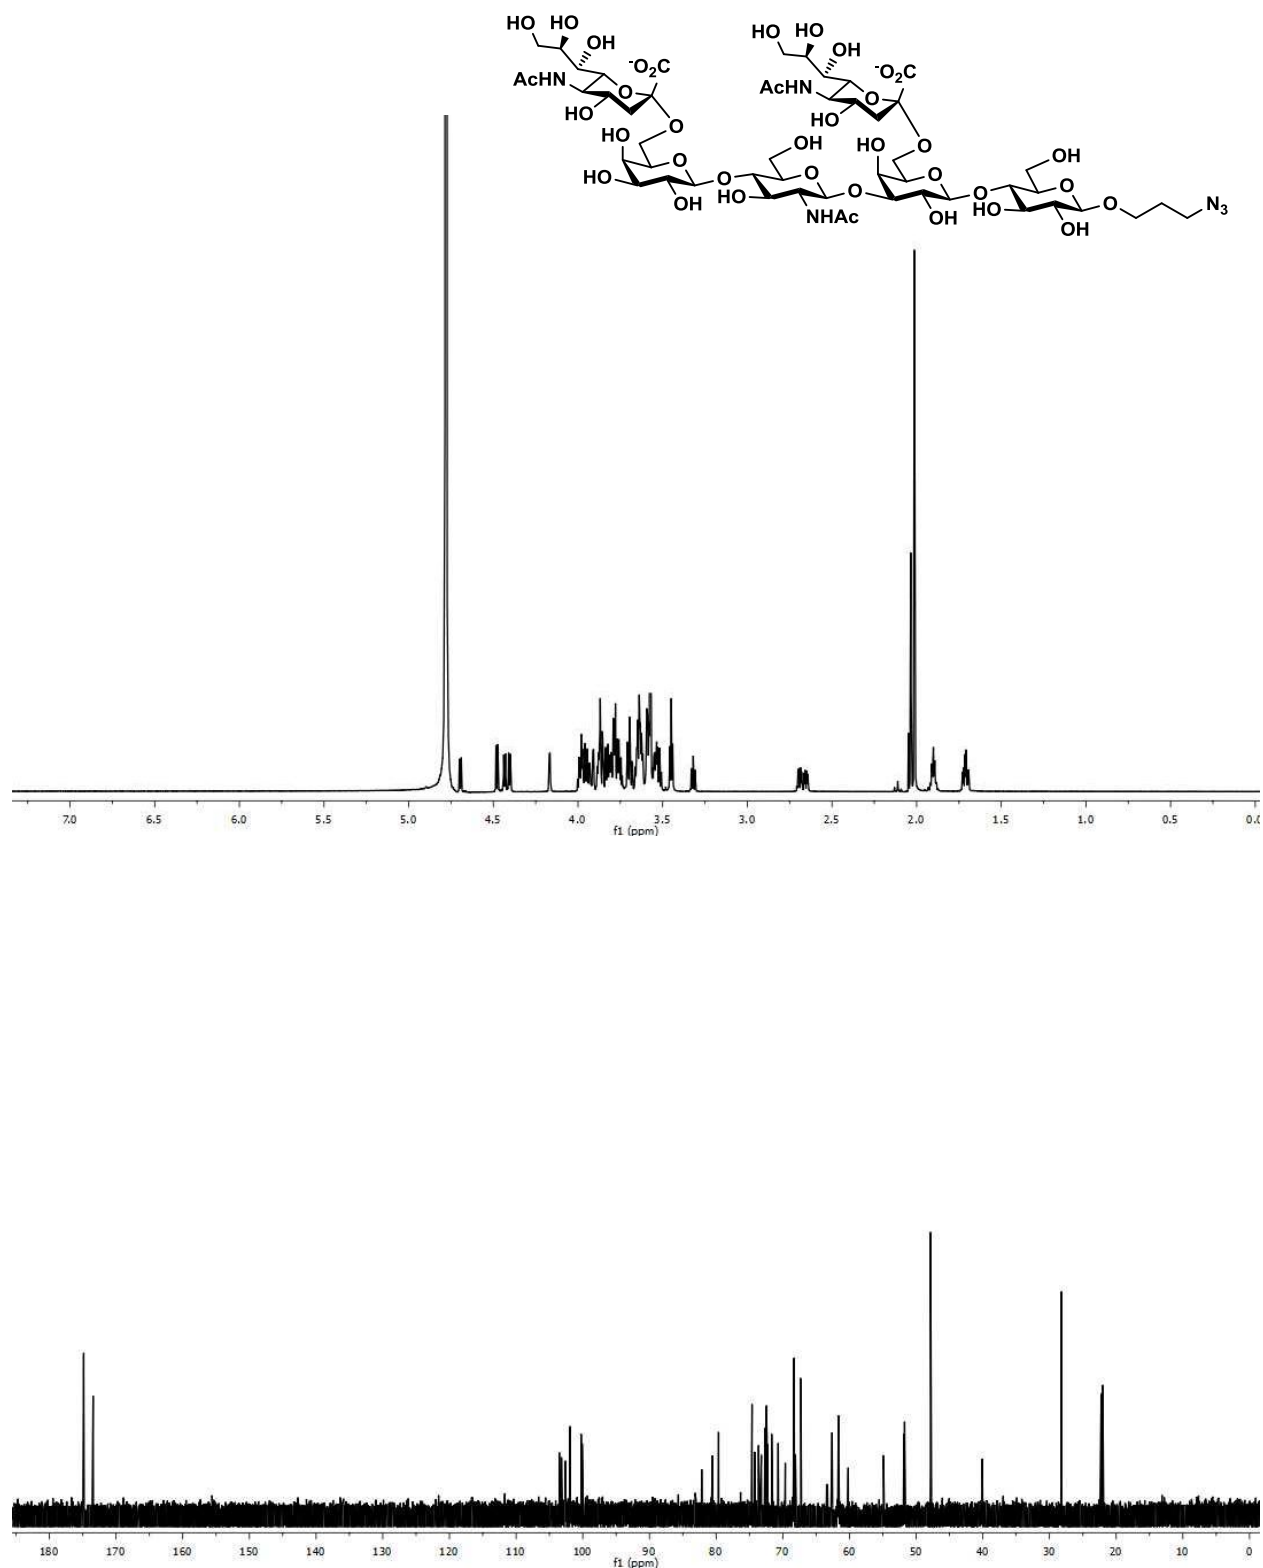

Supplement: c6ob02702d1.pdf [file c6ob02702d1.pdf]
